# Supplementary material for: Randomised Trial Support for Orthopaedic Surgical Procedures
Source: PLOS journal article supplement (doi:10.1371/journal.pone.0096745), 2014-06-13
Supplement: S5 (10.1371/journal.pone.0096745.s005) [file journal.pone.0096745.s005]

## APPENDIX 5

### Risk of bias assessment of 83 included RCTs using the Cochrane Collaboration's Risk of Bias tool.

|                   | Random sequence generation (selection bias) | Allocation concealment (selection bias) | Blinding of participants and personnel (performance bias) | Blinding of outcome assessment (detection bias) | Incomplete outcome data (attrition bias) | Selective reporting (reporting bias) |
|-------------------|---------------------------------------------|-----------------------------------------|-----------------------------------------------------------|-------------------------------------------------|------------------------------------------|--------------------------------------|
| Abdel-salam 1991  | ●                                           | ?                                       | ●                                                         | ?                                               | ●                                        | ●                                    |
| Altamimi 2008     | ●                                           | ●                                       | ●                                                         | ?                                               | ●                                        | ●                                    |
| Andersson 1992    | ●                                           | ●                                       | ?                                                         | ?                                               | ●                                        | ●                                    |
| Arden 2008        | ●                                           | ●                                       | ●                                                         | ●                                               | ●                                        | ●                                    |
| Azzopardi 2005    | ●                                           | ?                                       | ●                                                         | ●                                               | ?                                        | ●                                    |
| Bannister 1989    | ●                                           | ?                                       | ●                                                         | ●                                               | ●                                        | ●                                    |
| Bauer 1985        | ●                                           | ?                                       | ●                                                         | ●                                               | ●                                        | ●                                    |
| Bong 1981         | ?                                           | ?                                       | ●                                                         | ●                                               | ?                                        | ●                                    |
| Bottoni 2002      | ●                                           | ●                                       | ●                                                         | ●                                               | ●                                        | ●                                    |
| Brox 1993         | ●                                           | ?                                       | ●                                                         | ●                                               | ?                                        | ●                                    |
| Buckley 2002      | ●                                           | ●                                       | ●                                                         | ?                                               | ●                                        | ●                                    |
| Carnanho 2009     | ●                                           | ●                                       | ●                                                         | ●                                               | ●                                        | ●                                    |
| Cetti 1993        | ?                                           | ?                                       | ●                                                         | ●                                               | ●                                        | ●                                    |
| Chang 1993        | ●                                           | ●                                       | ●                                                         | ●                                               | ●                                        | ●                                    |
| Christiansen 2008 | ●                                           | ●                                       | ●                                                         | ?                                               | ●                                        | ●                                    |
| Edmonds 2003      | ?                                           | ?                                       | ●                                                         | ●                                               | ●                                        | ●                                    |
| Ekenstam 1989     | ●                                           | ●                                       | ●                                                         | ?                                               | ?                                        | ●                                    |
| Ernst 1995        | ●                                           | ?                                       | ●                                                         | ●                                               | ●                                        | ?                                    |
| Eryilmaz 2005     | ?                                           | ?                                       | ●                                                         | ●                                               | ●                                        | ●                                    |
| Fjalestad 2010    | ●                                           | ●                                       | ●                                                         | ?                                               | ●                                        | ●                                    |
| Foster 2003       | ?                                           | ●                                       | ●                                                         | ●                                               | ●                                        | ●                                    |
| Fulford 1993      | ●                                           | ●                                       | ●                                                         | ?                                               | ●                                        | ●                                    |
| Garland 1964      | ?                                           | ?                                       | ●                                                         | ?                                               | ●                                        | ●                                    |
| Gerristen 2002    | ●                                           | ●                                       | ●                                                         | ●                                               | ●                                        | ●                                    |
| Gupta 1999        | ?                                           | ?                                       | ●                                                         | ●                                               | ●                                        | ●                                    |
| Haahr 2005        | ●                                           | ●                                       | ●                                                         | ●                                               | ●                                        | ●                                    |
| Herrlin 2006      | ?                                           | ?                                       | ●                                                         | ●                                               | ●                                        | ●                                    |
| Hooper 1991       | ●                                           | ?                                       | ●                                                         | ●                                               | ●                                        | ●                                    |
| Hornby 1989       | ●                                           | ●                                       | ●                                                         | ●                                               | ●                                        | ●                                    |
| Imatani 1975      | ●                                           | ●                                       | ●                                                         | ●                                               | ?                                        | ●                                    |
| Jakobsen 2007     | ●                                           | ●                                       | ●                                                         | ●                                               | ●                                        | ●                                    |
| Jarvik 2009       | ●                                           | ●                                       | ●                                                         | ●                                               | ●                                        | ●                                    |
| Judd 2009         | ●                                           | ●                                       | ●                                                         | ●                                               | ●                                        | ●                                    |
| Kalunian 2000     | ●                                           | ?                                       | ●                                                         | ●                                               | ●                                        | ●                                    |
| Kapoor 2000       | ?                                           | ?                                       | ●                                                         | ●                                               | ?                                        | ●                                    |
| Karlalani 2000    | ?                                           | ?                                       | ●                                                         | ●                                               | ●                                        | ●                                    |
| Ketola 2009       | ●                                           | ●                                       | ●                                                         | ●                                               | ●                                        | ●                                    |
| Kettunen 2007     | ●                                           | ●                                       | ●                                                         | ●                                               | ●                                        | ●                                    |
| Kirkley 1999      | ●                                           | ●                                       | ●                                                         | ●                                               | ●                                        | ●                                    |

|                        |   |   |   |   |   |   |
|------------------------|---|---|---|---|---|---|
| Kirkley 2008           | ● | ● | ● | ● | ● | ● |
| Korthals-de Bos 2006   | ? | ? | ● | ● | ● | ● |
| Larsen 1986            | ● | ● | ● | ● | ● | ● |
| Livesley 1991          | ● | ● | ● | ● | ● | ● |
| Ly-Pen 2005            | ● | ● | ● | ● | ● | ● |
| Majewski 2000          | ? | ? | ● | ? | ? | ? |
| Makwana 2001           | ● | ● | ● | ● | ● | ● |
| McLauchlan 2002        | ● | ● | ● | ● | ● | ● |
| McQueen 1996           | ? | ● | ● | ? | ? | ● |
| Metz 2008              | ● | ● | ● | ● | ● | ● |
| Moller 2001            | ● | ● | ● | ● | ● | ● |
| Moonsmayer 2010        | ● | ● | ● | ● | ● | ● |
| Moseley 2002           | ● | ● | ● | ● | ● | ● |
| Nikku 1997             | ● | ● | ● | ● | ● | ● |
| Nilsson-Helander 2010  | ● | ● | ● | ● | ● | ● |
| Nistor 1981            | ● | ● | ● | ● | ● | ● |
| Odensten 1983          | ? | ? | ? | ? | ? | ● |
| Palmu 2008             | ● | ● | ● | ● | ● | ● |
| Pandey 2008            | ? | ? | ● | ● | ● | ● |
| Parmar 1993            | ? | ? | ● | ? | ● | ● |
| Peters 1997            | ? | ? | ● | ? | ? | ? |
| Phillips 1985          | ● | ● | ● | ? | ● | ● |
| Rodriguez-Merchan 1997 | ● | ● | ● | ? | ● | ● |
| Rowley 1986            | ● | ● | ● | ? | ● | ? |
| Salai 2000             | ● | ● | ● | ● | ● | ● |
| Sandberg 1987          | ● | ● | ● | ● | ● | ● |
| Shankar 1992           | ? | ? | ● | ? | ● | ● |
| Singh 1989             | ? | ? | ● | ● | ● | ● |
| Smekal 2009            | ● | ● | ● | ● | ● | ● |
| Spires 1987            | ● | ● | ? | ? | ● | ● |
| Stoffelen 1998         | ? | ? | ● | ? | ● | ● |
| Stringer 1988          | ? | ? | ● | ● | ● | ● |
| Thermann 1995          | ? | ? | ● | ? | ? | ? |
| Torkki 2001            | ● | ● | ● | ● | ● | ● |
| Twaddle 2007           | ● | ● | ● | ? | ● | ● |
| Van der Linden 1979    | ? | ? | ● | ● | ● | ● |
| Willitis 2010          | ● | ● | ● | ? | ● | ● |
| Wintzell 1999          | ● | ● | ● | ● | ● | ● |
| Wintzell 2000          | ● | ● | ● | ● | ● | ● |
| Wong 2010              | ? | ● | ● | ● | ● | ● |
| Wood 2003              | ● | ? | ● | ? | ● | ● |
| Xu 2008                | ? | ? | ? | ? | ? | ? |
| Zyluk 2007             | ? | ? | ? | ? | ● | ● |
| Zyto 1997              | ● | ● | ● | ● | ● | ● |
